# Supplementary material
Source: PubMed Central journal article supplement (PMC3228899)
Supplement: NIHMS326371-supplement-2.pdf [file NIHMS326371-supplement-2.pdf]

# Additional checklist for *Nature* Biology manuscripts

Manuscript number: 2011-02-01565B

Author name: Mart Loog

Title: **Cascades of multisite phosphorylation control Sic1 destruction at the onset of S phase**

These points are additional to those in the production checklist at [http://mts-nature.nature.com/letters/ms\\_checklist.pdf](http://mts-nature.nature.com/letters/ms_checklist.pdf). Please note that we cannot accept your paper unless you have completed and returned BOTH checklists and confirmed that your manuscript meets the relevant formatting and accessibility/reproducibility criteria.

## 1. Formatting

Please confirm that the following points are correctly formatted in your manuscript.

| <b>Formatting:</b>                                                                                                                                                                                                                         | Yes        |
|--------------------------------------------------------------------------------------------------------------------------------------------------------------------------------------------------------------------------------------------|------------|
| Paper within the requested length limit (and if applicable, please use the provided macro to help determine the length).                                                                                                                   | 4.43 pages |
| Methods summary less than 300 words and full methods provided in the SAME Word document as the main text, after the figure legends (the numbering of references used only in the full methods section continues from the main references). | x          |
| All error bars defined in the figure legends.                                                                                                                                                                                              | x          |
| The <i>n</i> is noted in all figure legends, where appropriate.                                                                                                                                                                            | x          |
| Figures do not contain tables as sub-panels. (Tables should be provided as separate display items.)                                                                                                                                        | x          |
| Where possible the SI is combined and submitted as a single PDF.                                                                                                                                                                           | x          |
| All SI files (including movies and large data sets) are uploaded on this version. (Production cannot access files provided with earlier versions.)                                                                                         | x          |
| We recommend no more than 10 SI files (including sound/movie files) submitted. Each individual file (including combined, single PDFs) no larger than 30 MB and the cumulative size of the files no larger than 150 MB.                     | x          |
| Figure legends in the SI displayed under the individual figures.                                                                                                                                                                           | x          |

## 2. Accessibility/Reproducibility

Please confirm that your manuscript meets each of the relevant criteria below, by ticking either "yes" or "not applicable".

| <b>Accessibility/Reproducibility</b>                                                                              | Yes | N/A |
|-------------------------------------------------------------------------------------------------------------------|-----|-----|
| RNAi expts: all small RNA sequences provided.                                                                     |     | x   |
| Microarray data in MIAME format.                                                                                  |     | x   |
| Full chemical characterization (including structure) provided for small molecules.                                |     | x   |
| <i>Nature</i> standard table used for X-ray crystallography/NMR structural data.                                  |     | x   |
| Accession numbers provided for protein structure/cryoEM structure/ microarray/gene sequences/short RNA sequences. |     | x   |
